# Supplementary material for: Facile fabrication of a CD/PVA composite polymer to access light-responsive shape-memory effects
Source: Royal Society of Chemistry journal article supplement (doi:10.1039/d0tc00910e), 2020-01-01
Supplement: d0tc00910e1.pdf [file d0tc00910e1.pdf]

# Facile fabrication of CDs/PVA composite polymer to access light-responsive shape-memory effects

*Shuangshuang Wu, Wei Li, Yuqiong Sun, Xiaoliang Pang, Xuejie Zhang, Jianle Zhuang, Haoran Zhang, Chaofan Hu, Bingfu Lei\*, Yingliang Liu\**

Guangdong Provincial Engineering Technology Research Center for Optical Agriculture, College of Materials and Energy, South China Agricultural University, Guangzhou 510642, P.R. China

Keyword: carbon dots / PVA composition, photo-thermal conversion, light-responsive, shape memory materials

## Supporting information

---

\* Corresponding authors: [tleibf@scau.edu.cn](mailto:tleibf@scau.edu.cn)(B. Lei), [tliuyl@scau.edu.cn](mailto:tliuyl@scau.edu.cn)(Y. Liu)

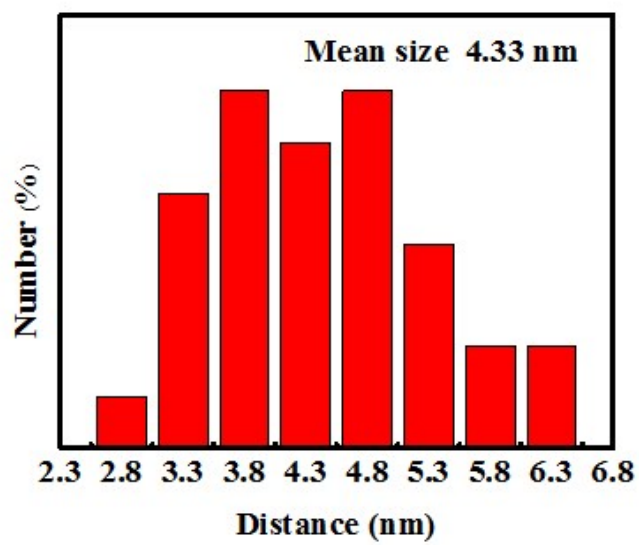

**Fig. S1** Particle size distribution of CDs.

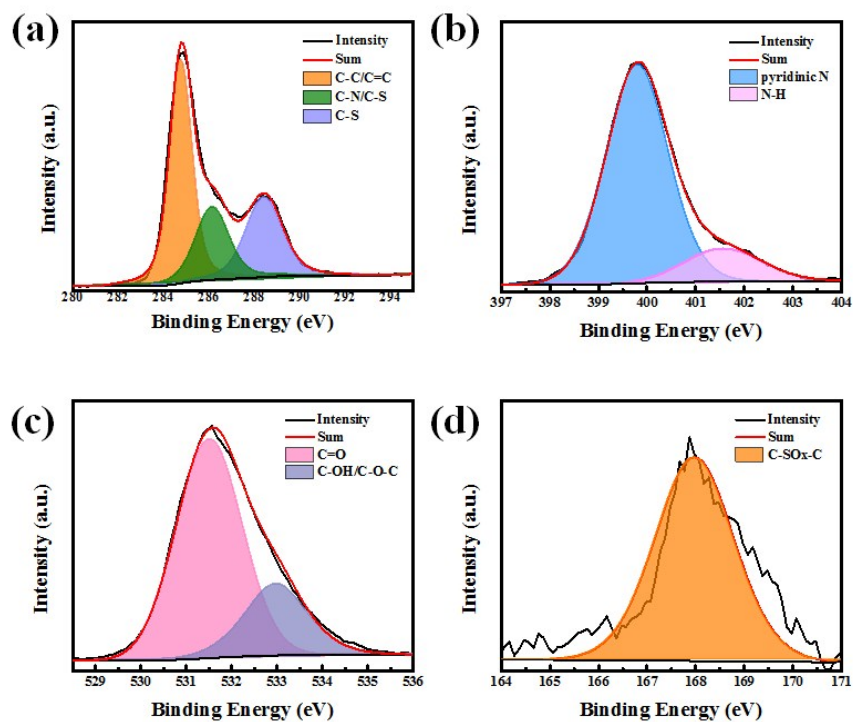

**Fig. S2** (a) XPS C 1s spectrum, (b) XPS N 1s spectrum, (c) XPS O 1s spectrum, and (d) XPS S 1s spectrum of CDs.

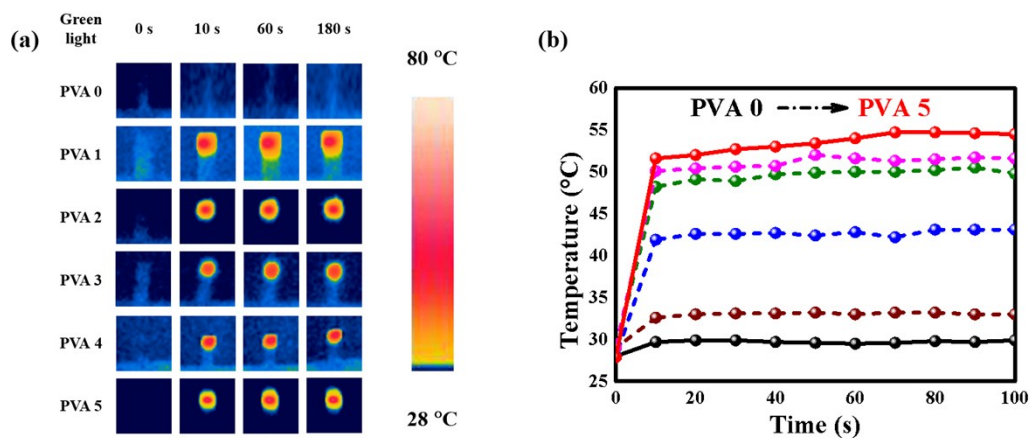

**Fig. S3** (a) The photothermal images of CDs / PVA composite polymer upon exposure to the 550 nm laser irradiation ( $0.10 \text{ W cm}^{-2}$ ) for various time. (b) Temperature variations of CDs / PVA composite polymer upon exposure to the 550 nm laser irradiation ( $0.10 \text{ W cm}^{-2}$ ).
